# Supplementary material for: Interactions of Ascorbic Acid, 5-Caffeoylquinic Acid, and Quercetin-3-Rutinoside in the Presence and Absence of Iron during Thermal Processing and the Influence on Antioxidant Activity
Source: MDPI journal article supplement (doi:10.3390/molecules26247698), 2021-12-20
Supplement: s1 [file s1]

## Supplementals

**Table S1.** Degradation ratio in percent of ascorbic acid (AsA), 5-caffeoylquinic acid (CQA), and quercetin-3-rutinoside (Rutin) with and without of iron, measured by HPLC. Values within  $\pm 20$  % are seen as stable.

| ID | substance | Insert<br>Concentration<br>[mM] | Degradation<br>ratio %<br>40 min<br>without iron | Degradation<br>ratio %<br>40 min<br>with iron | Degradation<br>ratio %<br>0 min<br>without iron | Degradation<br>ratio %<br>0 min<br>with iron |
|----|-----------|---------------------------------|--------------------------------------------------|-----------------------------------------------|-------------------------------------------------|----------------------------------------------|
| 1  | AsA       | 0.3                             | 26.76                                            | 94.93                                         | stable                                          | stable                                       |
| 2  | CQA       | 0.3                             | stable                                           | stable                                        | stable                                          | stable                                       |
| 3  | Rutin     | 0.3                             | stable                                           | stable                                        | stable                                          | stable                                       |
| 4  | AsA       | 0.15                            | 60.49                                            | 90.54                                         | stable                                          | 26.30                                        |
|    | CQA       | 0.15                            | stable                                           | 23.71                                         | stable                                          | stable                                       |
| 5  | AsA       | 0.15                            | 65.47                                            | 89.38                                         | stable                                          | 34.41                                        |
|    | Rutin     | 0.15                            | stable                                           | 32.63                                         | stable                                          | stable                                       |
| 6  | CQA       | 0.15                            | stable                                           | 35.14                                         | stable                                          | stable                                       |
|    | Rutin     | 0.15                            | stable                                           | stable                                        | stable                                          | stable                                       |
| 7  | AsA       | 0.1                             | 86.41                                            | 84.56                                         | stable                                          | 48.58                                        |
|    | CQA       | 0.2                             | stable                                           | 36.92                                         | stable                                          | stable                                       |
| 8  | AsA       | 0.1                             | 81.93                                            | 84.33                                         | stable                                          | 57.16                                        |
|    | Rutin     | 0.2                             | stable                                           | 23.49                                         | stable                                          | stable                                       |
| 9  | CQA       | 0.1                             | stable                                           | 22.81                                         | stable                                          | 25.47                                        |
|    | Rutin     | 0.2                             | stable                                           | stable                                        | stable                                          | stable                                       |
| 10 | AsA       | 0.2                             | 44.08                                            | 92.32                                         | stable                                          | stable                                       |
|    | CQA       | 0.1                             | stable                                           | 37.81                                         | stable                                          | stable                                       |
| 11 | AsA       | 0.2                             | 51.67                                            | 92.02                                         | stable                                          | 27.85                                        |
|    | Rutin     | 0.1                             | stable                                           | 39.56                                         | stable                                          | stable                                       |
| 12 | CQA       | 0.2                             | stable                                           | 25.27                                         | stable                                          | stable                                       |
|    | Rutin     | 0.1                             | stable                                           | stable                                        | stable                                          | stable                                       |
| 13 | AsA       | 0.1                             | 77.84                                            | 85.31                                         | stable                                          | 52.79                                        |
|    | CQA       | 0.1                             | stable                                           | 58.06                                         | stable                                          | stable                                       |
|    | Rutin     | 0.1                             | stable                                           | stable                                        | stable                                          | stable                                       |
| 14 | AsA       | 0.075                           | 87.44                                            | 85.65                                         | 20.16                                           | 63.85                                        |
|    | CQA       | 0.15                            | stable                                           | 49.16                                         | stable                                          | stable                                       |
|    | Rutin     | 0.075                           | stable                                           | stable                                        | stable                                          | stable                                       |
| 15 | AsA       | 0.075                           | 84.79                                            | 79.77                                         | stable                                          | 30.29                                        |
|    | CQA       | 0.075                           | stable                                           | 69.43                                         | stable                                          | stable                                       |
|    | Rutin     | 0.15                            | stable                                           | stable                                        | stable                                          | stable                                       |
| 16 | AsA       | 0.15                            | 61.67                                            | 89.99                                         | stable                                          | 39.51                                        |
|    | CQA       | 0.075                           | stable                                           | 56.69                                         | stable                                          | stable                                       |
|    | Rutin     | 0.075                           | stable                                           | stable                                        | stable                                          | stable                                       |
| 17 | AsA       | 0.06                            | 90.05                                            | 75.97                                         | 43.98                                           | 34.77                                        |
|    | CQA       | 0.12                            | stable                                           | 68.83                                         | stable                                          | stable                                       |
|    | Rutin     | 0.12                            | stable                                           | stable                                        | stable                                          | stable                                       |
| 18 | AsA       | 0.12                            | 72.82                                            | 87.21                                         | stable                                          | 49.02                                        |
|    | CQA       | 0.06                            | stable                                           | 70.62                                         | stable                                          | stable                                       |
|    | Rutin     | 0.12                            | stable                                           | stable                                        | stable                                          | stable                                       |

|    |       |      |        |        |        |        |
|----|-------|------|--------|--------|--------|--------|
| 19 | AsA   | 0.12 | 83.46  | 87.87  | stable | 50.25  |
|    | CQA   | 0.12 | stable | 55.96  | stable | stable |
|    | Rutin | 0.06 | stable | stable | stable | stable |

\* Degradation ratio [%] = [(insert concentration-concentration after 40 min of cooking)/insert concentration] \*100
